# Supplementary material for: Clinically‐accessible and laboratory‐derived predictors of biomechanical response to standalone and supported lateral wedge insoles in people with knee osteoarthritis
Source: Springer Nature journal article supplement (doi:10.1186/s13047-023-00671-7), 2023-01-01
Supplement: MOESM2 [file 26229788]

**Supplementary File 2. Knee and ankle biomechanical outcomes across insole conditions.**  
 Values are reported as mean  $\pm$  standard deviation.

| Outcome                                              | Insole Condition |                               |                               |
|------------------------------------------------------|------------------|-------------------------------|-------------------------------|
|                                                      | FLAT             | WEDG                          | WEDG + V-ARCH                 |
| KAM peak (Nm/kg)                                     | 0.50 $\pm$ 0.14  | 0.49 $\pm$ 0.14 <sup>a</sup>  | 0.49 $\pm$ 0.14               |
| KAM impulse (Nm/kg•sec)                              | 0.18 $\pm$ 0.08  | 0.17 $\pm$ 0.08 <sup>a</sup>  | 0.18 $\pm$ 0.08               |
| Knee frontal plane angle midstance (°) *             | -2.0 $\pm$ 5.0   | -2.0 $\pm$ 5.1                | -2.1 $\pm$ 5.1                |
| Ankle/subtalar eversion moment peak (Nm/kg) *        | -0.14 $\pm$ 0.08 | -0.17 $\pm$ 0.08 <sup>a</sup> | -0.15 $\pm$ 0.07 <sup>b</sup> |
| Ankle/subtalar eversion moment impulse (Nm/kg•sec) * | -0.04 $\pm$ 0.02 | -0.06 $\pm$ 0.03 <sup>a</sup> | -0.05 $\pm$ 0.03 <sup>a</sup> |
| Ankle/subtalar eversion angle peak (°) *             | -1.7 $\pm$ 3.8   | -2.5 $\pm$ 3.8 <sup>a</sup>   | -3.2 $\pm$ 4.1 <sup>a,b</sup> |
| Ankle/subtalar eversion excursion (°)                | 7.0 $\pm$ 2.7    | 7.2 $\pm$ 2.7                 | 7.0 $\pm$ 2.5                 |

<sup>a</sup> and <sup>b</sup> denote a significant difference from FLAT and WEDG, respectively ( $p < 0.05$ ).

\* Negative values denote knee varus and ankle/subtalar eversion.
