# Supplementary material for: Clinically‐accessible and laboratory‐derived predictors of biomechanical response to standalone and supported lateral wedge insoles in people with knee osteoarthritis
Source: Springer Nature journal article supplement (doi:10.1186/s13047-023-00671-7), 2023-01-01
Supplement: MOESM3 [file 26229788]

**Supplementary File 3. Univariable logistic regression model statistics.** Data are presented for all predictor variables, response thresholds, and lateral wedge insole conditions for models that correspond to the clinically-accessible (Clin) and laboratory-derived (Lab) versions of the predictor variable, respectively. Bolded odds ratio values and p-values indicate statistical significance ( $p < 0.05$ ). Unbolded odds ratios values and p-values indicate a predictor variable of interest ( $0.05 < p < 0.10$ ). Odds ratios values and p-values were omitted if the predictor variable did not minimally reach the threshold of interest ( $p \geq 0.10$ ).

| Response Threshold                   |          | WEDG                  |                       |                       | WEDG+V-ARCH           |                       |                       |
|--------------------------------------|----------|-----------------------|-----------------------|-----------------------|-----------------------|-----------------------|-----------------------|
|                                      |          | 2%                    | 6%                    | 10%                   | 2%                    | 6%                    | 10%                   |
| Age                                  | OR       |                       |                       |                       |                       |                       |                       |
|                                      | 95%CI    | -                     | -                     | -                     | -                     | -                     | -                     |
|                                      | <i>p</i> |                       |                       |                       |                       |                       |                       |
| Sex                                  | OR       |                       |                       |                       |                       | 0.333                 |                       |
|                                      | 95%CI    | -                     | -                     | -                     | -                     | (0.095, 1.173)        | -                     |
|                                      | <i>p</i> |                       |                       |                       |                       | 0.087                 |                       |
| BMI                                  | OR       |                       |                       |                       |                       |                       | <b>0.802</b>          |
|                                      | 95%CI    | -                     | -                     | -                     | -                     | -                     | <b>(0.653, 0.985)</b> |
|                                      | <i>p</i> |                       |                       |                       |                       |                       | <b>0.035</b>          |
| FPI                                  | OR       |                       |                       |                       |                       |                       |                       |
|                                      | 95%CI    | -                     | -                     | -                     | -                     | -                     | -                     |
|                                      | <i>p</i> |                       |                       |                       |                       |                       |                       |
| NRS pain                             | OR       |                       |                       |                       |                       |                       |                       |
|                                      | 95%CI    | -                     | -                     | -                     | -                     | -                     | -                     |
|                                      | <i>p</i> |                       |                       |                       |                       |                       |                       |
| FFI pain                             | OR       | 0.971                 |                       |                       |                       |                       |                       |
|                                      | 95%CI    | (0.937, 1.005)        | -                     | -                     | -                     | -                     | -                     |
|                                      | <i>p</i> | 0.096                 |                       |                       |                       |                       |                       |
| KL grade                             | OR       | 0.350                 | <b>0.295</b>          | <b>0.227</b>          |                       | <b>0.279</b>          | <b>0.142</b>          |
|                                      | 95%CI    | (0.110, 1.110)        | <b>(0.093, 0.933)</b> | <b>(0.061, 0.841)</b> | -                     | <b>(0.085, 0.910)</b> | <b>(0.027, 0.731)</b> |
|                                      | <i>p</i> | 0.075                 | <b>0.038</b>          | <b>0.026</b>          |                       | <b>0.034</b>          | <b>0.020</b>          |
| Gait speed (Clin)                    | OR       | <b>2.068</b>          | <b>1.448</b>          |                       | <b>1.678</b>          | <b>1.867</b>          | <b>1.682</b>          |
|                                      | 95%CI    | <b>(1.282, 3.337)</b> | <b>(1.025, 2.045)</b> | -                     | <b>(1.137, 2.477)</b> | <b>(1.224, 2.847)</b> | <b>(1.107, 2.555)</b> |
|                                      | <i>p</i> | <b>0.003</b>          | <b>0.036</b>          |                       | <b>0.009</b>          | <b>0.004</b>          | <b>0.015</b>          |
| Knee alignment (Clin)                | OR       | 1.184                 | <b>1.224</b>          | 1.208                 |                       | <b>1.212</b>          | <b>1.382</b>          |
|                                      | 95%CI    | (0.990, 1.416)        | <b>(1.015, 1.475)</b> | (0.994, 1.469)        | -                     | <b>(1.005, 1.461)</b> | <b>(1.076, 1.775)</b> |
|                                      | <i>p</i> | 0.065                 | <b>0.034</b>          | 0.057                 |                       | <b>0.044</b>          | <b>0.011</b>          |
| Ankle/subtalar joint eversion (Clin) | OR       |                       |                       |                       |                       |                       |                       |
|                                      | 95%CI    | -                     | -                     | -                     | -                     | -                     | -                     |
|                                      | <i>p</i> |                       |                       |                       |                       |                       |                       |
| Foot progression angle (Clin)        | OR       |                       |                       |                       |                       |                       |                       |
|                                      | 95%CI    | -                     | -                     | -                     | -                     | -                     | -                     |
|                                      | <i>p</i> |                       |                       |                       |                       |                       |                       |

|                                     |          |                |                |   |                |                |                |
|-------------------------------------|----------|----------------|----------------|---|----------------|----------------|----------------|
| Gait speed (Lab)                    | OR       | <b>2.200</b>   | <b>1.488</b>   | - | <b>1.775</b>   | <b>1.978</b>   | <b>1.815</b>   |
|                                     | 95%CI    | <b>(1.332,</b> | <b>(1.043,</b> | - | <b>(1.182,</b> | <b>(1.277,</b> | <b>(1.162,</b> |
|                                     | <i>p</i> | <b>3.633)</b>  | <b>2.121)</b>  | - | <b>2.665)</b>  | <b>3.065)</b>  | <b>2.835)</b>  |
|                                     |          | <b>0.002</b>   | <b>0.028</b>   | - | <b>0.006</b>   | <b>0.002</b>   | <b>0.009</b>   |
| Knee alignment (Lab)                | OR       | -              | 1.109          | - | -              | -              | <b>1.277</b>   |
|                                     | 95%CI    | -              | (0.984,        | - | -              | -              | <b>(1.072,</b> |
|                                     | <i>p</i> | -              | 1.249)         | - | -              | -              | <b>1.522)</b>  |
|                                     |          | -              | <b>0.091</b>   | - | -              | -              | <b>0.006</b>   |
| Ankle/subtalar joint eversion (Lab) | OR       | -              | -              | - | -              | -              | -              |
|                                     | 95%CI    | -              | -              | - | -              | -              | -              |
|                                     | <i>p</i> | -              | -              | - | -              | -              | -              |
| Foot progression angle (Lab)        | OR       | -              | -              | - | -              | -              | -              |
|                                     | 95%CI    | -              | -              | - | -              | -              | -              |
|                                     | <i>p</i> | -              | -              | - | -              | -              | -              |

Abbreviations: BMI = body mass index, FFI = foot function index, FPI = foot posture index, KL = Kellgren & Lawrence, OR = odds ratio
