# Supplementary material for: Clinically‐accessible and laboratory‐derived predictors of biomechanical response to standalone and supported lateral wedge insoles in people with knee osteoarthritis
Source: Springer Nature journal article supplement (doi:10.1186/s13047-023-00671-7), 2023-01-01
Supplement: MOESM4 [file 26229788]

**Supplementary File 4a. AIC-selected logistic regression model statistics for 6% response threshold.** Bolded odds ratio values and p-values indicate statistical significance ( $\alpha = 0.05$ ).

|                                          | WEDG                     |                         | WEDG+V-ARCH              |                             |
|------------------------------------------|--------------------------|-------------------------|--------------------------|-----------------------------|
|                                          | Clinically-Accessible    | Laboratory Derived      | Clinically-Accessible    | Laboratory Derived          |
| Responder : Non-Responder                | 22:31                    | 22:31                   | 20:33                    | 20:33                       |
| Model AIC                                | 68.786                   | 68.998                  | 58.340                   | 57.563                      |
| Model Likelihood Ratio (p-value)         | <i>p</i> <b>0.010</b>    | <b>0.011</b>            | <b>&lt;0.001</b>         | <b>&lt;0.001</b>            |
| H&L Goodness of Fit (p-value)            | <i>p</i> 0.622           | 0.195                   | 0.180                    | 0.127                       |
| AUC ROC (c)                              | <i>c</i> 0.736           | 0.717                   | 0.864                    | 0.861                       |
|                                          | 95%CI (0.600, 0.875)     | (0.575, 0.862)          | (0.749, 0.978)           | (0.747, 0.974)              |
| <b>Odds Ratios by Predictor Variable</b> |                          |                         |                          |                             |
|                                          | <u>Knee Align (Clin)</u> | <u>Gait Speed (Lab)</u> | <u>Gait Speed (Clin)</u> | <u>Gait Speed (Lab)</u>     |
| OR                                       | 1.203                    | <b>1.438</b>            | <b>1.800</b>             | <b>2.003</b>                |
| 95%CI                                    | (0.995, 1.455)           | <b>(1.005, 2.056)</b>   | <b>(1.162, 2.787)</b>    | <b>(1.247, 3.217)</b>       |
| <i>p</i>                                 | <i>0.056</i>             | <b>0.047</b>            | <b>0.008</b>             | <b>0.004</b>                |
|                                          | <u>Gait Speed (Clin)</u> | <u>KL Grade</u>         | <u>KL Grade</u>          | <u>Sex</u>                  |
| OR                                       | 1.400                    | 0.329                   | 0.330                    | <b>0.118</b>                |
| 95%CI                                    | (0.985, 1.990)           | (0.099, 1.094)          | (0.073, 1.499)           | <b>(0.017, 0.794)</b>       |
| <i>p</i>                                 | <i>0.061</i>             | <i>0.070</i>            | <i>0.151</i>             | <b>0.028</b>                |
|                                          |                          |                         | <u>Sex</u>               | <u>KL Grade</u>             |
| OR                                       |                          |                         | <b>0.149</b>             | <b>0.201</b>                |
| 95%CI                                    |                          |                         | <b>(0.026, 0.866)</b>    | <b>(0.044, 0.928)</b>       |
| <i>p</i>                                 |                          |                         | <b>0.034</b>             | <b>0.040</b>                |
|                                          |                          |                         | <u>Knee Align (Clin)</u> | <u>Ankle Eversion (Lab)</u> |
| OR                                       |                          |                         | 1.221                    | 1.274                       |
| 95%CI                                    |                          |                         | (0.965, 1.545)           | (0.936, 1.736)              |
| <i>p</i>                                 |                          |                         | <i>0.097</i>             | <i>0.124</i>                |

Abbreviations: AIC = Akaike information criterion, AUC = Area under curve, BMI = body mass index, FFI = Foot function index, FPI = foot posture index, H&L = Hosmer & Lemeshow, KL = Kellgren & Lawrence, OR = odds ratio, ROC = Receiver operating characteristic

**Supplementary File 4b. AIC-selected logistic regression model statistics for 10% response threshold.** Bolded odds ratio values and p-values indicate statistical significance ( $\alpha = 0.05$ ).

|                                          | WEDG                     |                       | WEDG+V-ARCH              |                         |
|------------------------------------------|--------------------------|-----------------------|--------------------------|-------------------------|
|                                          | Clinically-Accessible    | Laboratory Derived    | Clinically-Accessible    | Laboratory Derived      |
| Responder : Non-Responder                | 16:37                    | 16:37                 | 12:41                    | 12:41                   |
| Model AIC                                | 61.298                   | 63.249                | 37.917                   | 30.071                  |
| Model Likelihood Ratio (p-value)         | <i>p</i> <b>0.009</b>    | <b>0.022</b>          | <b>&lt;0.001</b>         | <b>&lt;0.001</b>        |
| H&L Goodness of Fit (p-value)            | <i>p</i> 0.846           | 0.670                 | 0.354                    | 0.999                   |
| AUC ROC (c)                              | <i>c</i> 0.782           | 0.731                 | 0.968                    | 0.976                   |
|                                          | 95%CI (0.642, 0.922)     | (0.575, 0.887)        | (0.920, 1.000)           | (0.937, 1.000)          |
| <b>Odds Ratios by Predictor Variable</b> |                          |                       |                          |                         |
|                                          | <u>KL Grade</u>          | <u>KL Grade</u>       | <u>Knee Align (Clin)</u> | <u>Knee Align (Lab)</u> |
| OR                                       | 0.250                    | <b>0.183</b>          | <b>2.308</b>             | <b>2.890</b>            |
| 95%CI                                    | (0.060, 1.045)           | <b>(0.046, 0.734)</b> | <b>(1.182, 4.666)</b>    | <b>(1.069, 7.810)</b>   |
| <i>p</i>                                 | 0.058                    | <b>0.016</b>          | <b>0.015</b>             | <b>0.036</b>            |
|                                          | <u>Age</u>               | <u>Age</u>            | <u>Gait Speed (Clin)</u> | <u>Gait Speed (Lab)</u> |
| OR                                       | 1.109                    | 1.072                 | <b>2.502</b>             | <b>3.944</b>            |
| 95%CI                                    | (0.995, 1.237)           | (0.973, 1.181)        | <b>(1.177, 5.316)</b>    | <b>(1.200, 12.965)</b>  |
| <i>p</i>                                 | 0.061                    | 0.157                 | <b>0.017</b>             | <b>0.024</b>            |
|                                          | <u>Knee Align (Clin)</u> |                       | <u>Age</u>               | <u>Sex</u>              |
| OR                                       | 1.253                    |                       | <b>1.264</b>             | 0.001                   |
| 95%CI                                    | (0.986, 1.591)           |                       | <b>(1.012, 1.577)</b>    | (<0.001, 1.071)         |
| <i>p</i>                                 | 0.065                    |                       | <b>0.038</b>             | 0.052                   |
|                                          |                          |                       | <u>KL Grade</u>          | <u>KL Grade</u>         |
| OR                                       |                          |                       | 0.078                    | 0.023                   |
| 95%CI                                    |                          |                       | (0.005, 1.147)           | (<0.001, 1.159)         |
| <i>p</i>                                 |                          |                       | 0.063                    | 0.059                   |
|                                          |                          |                       | <u>Sex</u>               | <u>Age</u>              |
| OR                                       |                          |                       | 0.113                    | 1.222                   |
| 95%CI                                    |                          |                       | (0.009, 1.440)           | (0.985, 1.517)          |
| <i>p</i>                                 |                          |                       | 0.093                    | 0.068                   |

Abbreviations: AIC = Akaike information criterion, AUC = Area under curve, BMI = body mass index, FFI = Foot function index, FPI = foot posture index, H&L = Hosmer & Lemeshow, KL = Kellgren & Lawrence, OR = odds ratio, ROC = Receiver operating characteristic
