# Supplementary material for: Clinically‐accessible and laboratory‐derived predictors of biomechanical response to standalone and supported lateral wedge insoles in people with knee osteoarthritis
Source: Springer Nature journal article supplement (doi:10.1186/s13047-023-00671-7), 2023-01-01
Supplement: MOESM5 [file 26229788]

### **Supplementary File 5. Overview of findings using force-entry modelling.**

The logistic regression models for predicting a 2% KAM impulse reduction with WEDG and WEDG+V-ARCH insole conditions were significant ( $p < 0.05$ ) using forced-entry of clinically-accessible and laboratory-derived pools of predictor variables. Model statistics and odds ratios for predictor variables at the 2% response threshold are summarized in below in Supplementary File 5a. At the 6% (Supplementary File 5b) and 10% (Supplementary File 5c) response thresholds, no models were significant for WEDG ( $p > 0.134$ ), and only the laboratory-derived model at 6% was significant for WEDG+V-ARCH. Both models were significant for WEDG+V-ARCH at 10%, though sex was excluded from the final model due to a lack of model convergence.

For the WEDG condition at the 2% response threshold, clinically-accessible and laboratory-derived gait speed was a significant predictor such that a faster gait speed was related to a greater likelihood of reducing the KAM impulse. NRS pain was the only other significant predictor in the clinically-accessible model for WEDG, such that higher knee pain was related to a greater likelihood of KAM impulse reduction. Predictor variables of interest ( $p < 0.10$ ) potentially linked to a greater likelihood of KAM impulse reduction included older age for the clinically-accessible model, and higher NRS pain and lower FFI pain for the laboratory-derived model.

For the WEDG+V-ARCH condition at the 2% response threshold, significant predictor variables for clinically-accessible and laboratory-derived models included gait speed and sex. Having faster gait speed and female sex were related to an increased likelihood of reducing the KAM impulse with WEDG+V-ARCH. NRS pain was also a significant predictor for the clinically-accessible model, such that higher knee pain was related to greater likelihood of KAM

impulse reduction with this insole. Predictor variables of interest ( $p < 0.10$ ) potentially linked to a greater likelihood of KAM impulse reduction included lower FFI pain for both clinically-accessible and laboratory-derived models, and increased NRS pain for the laboratory-derived model only.

In other significant models at 6% and 10% KAM reduction thresholds, faster gait speeds and female sex were generally seen to be predictive of KAM response when wearing WEDG+V-ARCH.

**Supplementary File 5a. Forced-entry logistic regression model statistics for 2% response threshold.** Bolded odds ratio values and p-values indicate statistical significance ( $\alpha = 0.05$ ).

|                                          | WEDG                  |                        | WEDG+V-ARCH           |                       |                       |
|------------------------------------------|-----------------------|------------------------|-----------------------|-----------------------|-----------------------|
|                                          | Clinically-Accessible | Laboratory Derived     | Clinically-Accessible | Laboratory Derived    |                       |
| Responder : Non-Responder                | 33:20                 | 33:20                  | 28:25                 | 28:25                 |                       |
| Model AIC                                | 65.652                | 68.375                 | 73.601                | 75.379                |                       |
| Model Likelihood Ratio (p-value)         | <i>p</i> <b>0.003</b> | <b>0.007</b>           | <b>0.014</b>          | <b>0.025</b>          |                       |
| H&L Goodness of Fit (p-value)            | <i>p</i> 0.670        | 0.550                  | 0.199                 | 0.571                 |                       |
| AUC ROC (c)                              | <i>c</i> 0.874        | 0.880                  | 0.861                 | 0.847                 |                       |
|                                          | 95%CI (0.780, 0.968)  | (0.789, 0.972)         | (0.762, 0.961)        | (0.738, 0.957)        |                       |
| <b>Odds Ratios by Predictor Variable</b> |                       |                        |                       |                       |                       |
| Age                                      | OR                    | 1.141                  | 1.072                 | 1.074                 | 1.048                 |
|                                          | 95%CI                 | (0.978, 1.331)         | (0.936, 1.226)        | (0.945, 1.222)        | (0.934, 1.176)        |
|                                          | <i>p</i>              | 0.093                  | 0.316                 | 0.275                 | 0.429                 |
| Sex                                      | OR                    | 1.041                  | 0.716                 | <b>0.148</b>          | <b>0.121</b>          |
|                                          | 95%CI                 | (0.158, 6.858)         | (0.091, 5.656)        | <b>(0.023, 0.961)</b> | <b>(0.015, 0.970)</b> |
|                                          | <i>p</i>              | 0.966                  | 0.751                 | <b>0.045</b>          | <b>0.047</b>          |
| BMI                                      | OR                    | 0.958                  | 0.960                 | 0.985                 | 1.004                 |
|                                          | 95%CI                 | (0.755, 1.214)         | (0.763, 1.207)        | (0.792, 1.225)        | (0.809, 1.247)        |
|                                          | <i>p</i>              | 0.721                  | 0.724                 | 0.892                 | 0.968                 |
| FPI                                      | OR                    | 0.948                  | 0.896                 | 0.995                 | 0.941                 |
|                                          | 95%CI                 | (0.751, 1.196)         | (0.720, 1.116)        | (0.807, 1.227)        | (0.772, 1.148)        |
|                                          | <i>p</i>              | 0.652                  | 0.328                 | 0.964                 | 0.551                 |
| NRS pain                                 | OR                    | <b>2.256</b>           | 1.692                 | <b>1.984</b>          | 1.538                 |
|                                          | 95%CI                 | <b>(1.041, 4.891)</b>  | (0.943, 3.036)        | <b>(1.070, 3.681)</b> | (0.939, 2.520)        |
|                                          | <i>p</i>              | <b>0.039</b>           | 0.078                 | <b>0.030</b>          | 0.087                 |
| FFI pain                                 | OR                    | 0.950                  | 0.949                 | 0.950                 | 0.955                 |
|                                          | 95%CI                 | (0.890, 1.013)         | (0.896, 1.006)        | (0.899, 1.004)        | (0.906, 1.008)        |
|                                          | <i>p</i>              | 0.118                  | 0.080                 | 0.069                 | 0.093                 |
| KL grade                                 | OR                    | 0.423                  | 0.319                 | 0.812                 | 0.576                 |
|                                          | 95%CI                 | (0.073, 2.462)         | (0.052, 1.961)        | (0.170, 3.870)        | (0.124, 2.667)        |
|                                          | <i>p</i>              | 0.339                  | 0.218                 | 0.794                 | 0.480                 |
| Gait speed                               | OR                    | <b>4.060</b>           | <b>3.001</b>          | <b>2.710</b>          | <b>2.288</b>          |
|                                          | 95%CI                 | <b>(1.551, 10.628)</b> | <b>(1.466, 6.144)</b> | <b>(1.329, 5.524)</b> | <b>(1.271, 4.117)</b> |
|                                          | <i>p</i>              | <b>0.004</b>           | <b>0.003</b>          | <b>0.006</b>          | <b>0.006</b>          |
| Knee alignment                           | OR                    | 1.279                  | 1.035                 | 1.190                 | 1.032                 |
|                                          | 95%CI                 | (0.939, 1.742)         | (0.846, 1.267)        | (0.904, 1.566)        | (0.873, 1.220)        |
|                                          | <i>p</i>              | 0.118                  | 0.737                 | 0.215                 | 0.711                 |

|                                  |          |                |                |                |                |
|----------------------------------|----------|----------------|----------------|----------------|----------------|
| Ankle/subtalar<br>joint eversion | OR       | 0.899          | 1.018          | 0.876          | 1.101          |
|                                  | 95%CI    | (0.703, 1.150) | (0.735, 1.410) | (0.704, 1.090) | (0.818, 1.481) |
|                                  | <i>p</i> | <i>0.397</i>   | <i>0.913</i>   | <i>0.234</i>   | <i>0.526</i>   |
| Foot progression<br>angle        | OR       | 0.875          | 0.922          | 0.909          | 1.006          |
|                                  | 95%CI    | (0.732, 1.047) | (0.802, 1.059) | (0.779, 1.060) | (0.888, 1.139) |
|                                  | <i>p</i> | <i>0.145</i>   | <i>0.250</i>   | <i>0.223</i>   | <i>0.924</i>   |

Abbreviations: AIC = Akaike information criterion, AUC = area under curve, BMI = body mass index, FFI = foot function index, FPI = foot posture index, H&L = Hosmer & Lemeshow, KL = Kellgren & Lawrence, OR = odds ratio, ROC = receiver operating characteristic.

**Supplementary File 5b. Forced-entry logistic regression model statistics for 6% response threshold.** Bolded odds ratio values and p-values indicate statistical significance ( $\alpha = 0.05$ ). Only significant models ( $p < 0.05$ ) with appropriate goodness of fit ( $p > 0.05$ ) are included.

|                                  | WEDG                  |                    | WEDG+V-ARCH           |                    |
|----------------------------------|-----------------------|--------------------|-----------------------|--------------------|
|                                  | Clinically-Accessible | Laboratory Derived | Clinically-Accessible | Laboratory Derived |
| Responder : Non-Responder        | 22:31                 | 22:31              | 20:33                 | 20:33              |
| Model AIC                        | 79.748                | 81.448             | 69.435                | 68.894             |
| Model Likelihood Ratio (p-value) | <i>p</i>              | <i>0.134</i>       | <b>0.010</b>          | <b>0.008</b>       |
| H&L Goodness of Fit (p-value)    | <i>p</i>              | <i>0.668</i>       | <b>0.013</b>          | <i>0.608</i>       |
| AUC ROC (c)                      | <i>c</i>              | 0.804              | 0.882                 | 0.880              |
|                                  | 95%CI                 | (0.687, 0.920)     | (0.776, 0.988)        | (0.780, 0.980)     |

**Odds Ratios by Predictor Variable**

|                |          |   |   |                       |
|----------------|----------|---|---|-----------------------|
| Age            | OR       |   |   | 1.052                 |
|                | 95%CI    | - | - | (0.921, 1.200)        |
|                | <i>p</i> |   |   | <i>0.456</i>          |
| Sex            | OR       |   |   | <b>0.072</b>          |
|                | 95%CI    | - | - | <b>(0.007, 0.736)</b> |
|                | <i>p</i> |   |   | <b>0.027</b>          |
| BMI            | OR       |   |   | 0.973                 |
|                | 95%CI    | - | - | (0.767, 1.234)        |
|                | <i>p</i> |   |   | <i>0.821</i>          |
| FPI            | OR       |   |   | 1.040                 |
|                | 95%CI    | - | - | (0.842, 1.284)        |
|                | <i>p</i> |   |   | <i>0.716</i>          |
| NRS pain       | OR       |   |   | 1.229                 |
|                | 95%CI    | - | - | (0.733, 2.062)        |
|                | <i>p</i> |   |   | <i>0.434</i>          |
| FFI pain       | OR       |   |   | 1.010                 |
|                | 95%CI    | - | - | (0.951, 1.071)        |
|                | <i>p</i> |   |   | <i>0.753</i>          |
| KL grade       | OR       |   |   | 0.230                 |
|                | 95%CI    | - | - | (0.040, 1.312)        |
|                | <i>p</i> |   |   | <i>0.098</i>          |
| Gait speed     | OR       |   |   | <b>2.146</b>          |
|                | 95%CI    | - | - | <b>(1.210, 3.805)</b> |
|                | <i>p</i> |   |   | <b>0.009</b>          |
| Knee alignment | OR       |   |   | 1.102                 |
|                | 95%CI    | - | - | (0.915, 1.328)        |

|                               |       |   |   |   |          |                |
|-------------------------------|-------|---|---|---|----------|----------------|
|                               |       |   |   |   | <i>p</i> | <i>0.306</i>   |
| Ankle/subtalar joint eversion | OR    |   |   |   |          | 1.246          |
|                               | 95%CI | - | - | - |          | (0.885, 1.754) |
|                               |       |   |   |   | <i>p</i> | <i>0.208</i>   |
| Foot progression angle        | OR    |   |   |   |          | 1.037          |
|                               | 95%CI | - | - | - |          | (0.914, 1.176) |
|                               |       |   |   |   | <i>p</i> | <i>0.575</i>   |

Abbreviations: AIC = Akaike information criterion, AUC = area under curve, BMI = body mass index, FFI = foot function index, FPI = foot posture index, H&L = Hosmer & Lemeshow, KL = Kellgren & Lawrence, OR = odds ratio, ROC = receiver operating characteristic

**Supplementary File 5c. Forced-entry logistic regression model statistics for 10% response threshold.** Bolded odds ratio values and p-values indicate statistical significance ( $\alpha = 0.05$ ). Only significant models ( $p < 0.05$ ) with appropriate goodness of fit ( $p > 0.05$ ) are included.

|                                  | WEDG                  |                    | WEDG+V-ARCH           |                      |
|----------------------------------|-----------------------|--------------------|-----------------------|----------------------|
|                                  | Clinically-Accessible | Laboratory Derived | Clinically-Accessible | Laboratory Derived * |
| Responder : Non-Responder        | 16:37                 | 16:37              | 12:41                 | 12:41                |
| Model AIC                        | 75.340                | 77.550             | 45.780                | 47.011               |
| Model Likelihood Ratio (p-value) | <i>p</i> 0.257        | 0.413              | <b>&lt;0.001</b>      | <b>&lt;0.001</b>     |
| H&L Goodness of Fit (p-value)    | <i>p</i> 0.923        | 0.678              | 0.822                 | 0.388                |
| AUC ROC (c)                      | c 0.812               | 0.770              | 0.968                 | 0.949                |
|                                  | 95%CI (0.670, 0.927)  | (0.631, 0.909)     | (0.923, 1.000)        | (0.895, 1.000)       |

**Odds Ratios by Predictor Variable**

|                |          |   |   |                       |                       |
|----------------|----------|---|---|-----------------------|-----------------------|
| Age            | OR       |   |   | 1.217                 | 1.141                 |
|                | 95%CI    | - | - | (0.938, 1.578)        | (0.934, 1.394)        |
|                | <i>p</i> |   |   | 0.140                 | 0.197                 |
| Sex            | OR       |   |   | 0.011                 |                       |
|                | 95%CI    | - | - | (<0.001, 6.149)       | -                     |
|                | <i>p</i> |   |   | 0.162                 |                       |
| BMI            | OR       |   |   | 0.658                 | 0.838                 |
|                | 95%CI    | - | - | (0.306, 1.417)        | (0.581, 1.209)        |
|                | <i>p</i> |   |   | 0.286                 | 0.345                 |
| FPI            | OR       |   |   | 0.708                 | 0.854                 |
|                | 95%CI    | - | - | (0.385, 1.303)        | (0.629, 1.159)        |
|                | <i>p</i> |   |   | 0.267                 | 0.310                 |
| NRS pain       | OR       |   |   | 0.778                 | 0.774                 |
|                | 95%CI    | - | - | (0.347, 1.742)        | (0.366, 1.637)        |
|                | <i>p</i> |   |   | 0.541                 | 0.503                 |
| FFI pain       | OR       |   |   | 1.006                 | 1.020                 |
|                | 95%CI    | - | - | (0.856, 1.182)        | (0.918, 1.133)        |
|                | <i>p</i> |   |   | 0.945                 | 0.711                 |
| KL grade       | OR       |   |   | 0.106                 | 0.081                 |
|                | 95%CI    | - | - | (0.002, 4.711)        | (0.005, 1.421)        |
|                | <i>p</i> |   |   | 0.246                 | 0.086                 |
| Gait speed     | OR       |   |   | 1.797                 | <b>2.286</b>          |
|                | 95%CI    | - | - | (0.690, 4.679)        | <b>(1.077, 4.853)</b> |
|                | <i>p</i> |   |   | 0.230                 | <b>0.031</b>          |
| Knee alignment | OR       |   |   | <b>2.388</b>          | <b>1.479</b>          |
|                | 95%CI    | - | - | <b>(1.041, 5.478)</b> | <b>(1.036, 2.112)</b> |

|                               |       | <i>p</i> |   | <b>0.040</b>   | <b>0.031</b>   |
|-------------------------------|-------|----------|---|----------------|----------------|
| Ankle/subtalar joint eversion | OR    |          |   | 1.274          | 1.037          |
|                               | 95%CI | -        | - | (0.724, 2.242) | (0.620, 1.735) |
|                               |       | <i>p</i> |   | <b>0.401</b>   | <b>0.890</b>   |
| Foot progression angle        | OR    |          |   | 1.081          | 0.937          |
|                               | 95%CI | -        | - | (0.838, 1.395) | (0.752, 1.167) |
|                               |       | <i>p</i> |   | <b>0.547</b>   | <b>0.559</b>   |

\* Indicates the Laboratory-Derived model for WEDG+V-ARCH used a pool of forced-entry predictor variables that excluded sex. The model which included sex was not reported because it did not converge statistically.

Abbreviations: AIC = Akaike information criterion, AUC = area under curve, BMI = body mass index, FFI = foot function index, FPI = foot posture index, H&L = Hosmer & Lemeshow, KL = Kellgren & Lawrence, OR = odds ratio, ROC = receiver operating characteristic
